# Supplementary material for: Thermocatalytic synthesis of 2-butanol from biomass-derived levulinic acid using carbon-doped titania-supported ruthenium
Source: Royal Society of Chemistry journal article supplement (doi:10.1039/d4se01815j), 2025-01-01
Supplement: d4se01815j1.pdf [file d4se01815j1.pdf]

*Electronic Supplementary Information for*

## **Thermocatalytic synthesis of 2-butanol from biomass-derived levulinic acid using carbon-doped titania supported ruthenium**

**Atina Sabila Azzahra,<sup>a</sup> Rodiansono,<sup>a,b\*</sup> Iryanti Fatyasari Nata,<sup>c</sup> Kiky Corneliasari Sembiring,<sup>d</sup>  
Indri Badria Adilina,<sup>d</sup> and Ahmad Afandi<sup>e</sup>**

<sup>a</sup>*Catalysis for Sustainable Energy & Environment (CATSuRe), Inorganic Materials & Catalysis (IMCat) Laboratory, Lambung Mangkurat University*

<sup>b</sup>*Department of Chemistry, Lambung Mangkurat University, Jl. A. Yani Km 36 Banjarbaru, Indonesia 70714.*

<sup>c</sup>*Department Chemical Engineering, Lambung Mangkurat University, Jl. A. Yani Km 35 Banjarbaru, Indonesia 70714*

<sup>d</sup>*Research Centre for Chemistry, BRIN, KST BJ Habibie, Serpong, Tangerang*

<sup>e</sup>*Research Centre for Advanced Materials, BRIN, KST BJ Habibie Serpong, Tangerang*

\*Corresponding authors: [rodiansono@ulm.ac.id](mailto:rodiansono@ulm.ac.id) (R. Rodiansono). Telp. /Fax.: +62 511 477 3112

Contents:

- 1) XRD pattern of (*op*)Ru@C-TiO<sub>2</sub> catalysts with different amount of carbon doping ((a) 1.0 wt%, (b) 2.0 wt%, (c) 3.0 wt%) after reduction with H<sub>2</sub> at 400 °C for 2 h (**Fig. S1**).
- 2) Pore sizes distribution calculated by using Hovartz-Kawazoe (HK) method for (*op*)Ru@C-TiO<sub>2</sub> sample with (a) different amount of C-doping and (b) different reduction temperature with H<sub>2</sub> for 2 h (**Fig. S2**).
- 3) ATR-IR spectra of (a) @TiO<sub>2</sub>, (b) @C-TiO<sub>2</sub> (2.0 wt%), and (c) (*op*)Ru@C-TiO<sub>2</sub> (2.0 wt%) catalysts after drying in room temperature (**Fig. S3**).
- 4) XRD patterns of (*op*)Ru@C-TiO<sub>2</sub> (C = 2.0 wt%) after reduction with H<sub>2</sub> at different temperatures of (a) 300 °C, (b) 400 °C, and (c) 500 °C for 2 h (**Fig. S4**).
- 5) TEM analysis of (*op*)Ru@C-TiO<sub>2</sub> (2.0 wt%) catalysts after reduction with H<sub>2</sub> at (a) 300 °C, (b) 400 °C and (c) 500 °C for 2 h, and (d) recovered (*op*)Ru@C-TiO<sub>2</sub> 400 °C/H<sub>2</sub> catalyst (**Fig. S5**).
- 6) SEM analysis of (*op*)Ru@C-TiO<sub>2</sub> with different amount of C-doping (a) 1.0 wt%; (b) 2.0 wt%) and (c) 3.0 wt%, and (d) typical EDS spectra of (*op*)Ru@C-TiO<sub>2</sub> (1.0 wt%) catalysts after reduction with H<sub>2</sub> at 400 °C for 2 h (**Fig. S6**).
- 7) Atomic composition (%) of synthesised Ru@C-TiO<sub>2</sub> catalyst derived from EDS data (**Table S1**).
- 8) The H<sub>2</sub>-TPR profiles of Ru@TiO<sub>2</sub> and (*op*)Ru@C-TiO<sub>2</sub> (2.0 wt%) catalysts and their deconvoluted spectra (**Fig. S7**).
- 9) NH<sub>3</sub>-TPD spectra of @TiO<sub>2</sub>, @C-TiO<sub>2</sub> supports and (*op*)Ru@C-TiO<sub>2</sub> (2.0 wt%) catalysts and their deconvoluted spectra (**Fig. S8**).
- 10) ATR-IR spectra of adsorbed pyridine on the surface of (a) (*cop*)Ru@TiO<sub>2</sub> (*op*)Ru@C-TiO<sub>2</sub> (1.0 wt%), (c) (*op*)Ru@C-TiO<sub>2</sub> (2.0 wt%), and (d) (*op*)Ru@C-TiO<sub>2</sub> (3.0 wt%) catalysts (**Fig. S9**).
- 11) UV-Vis DRS spectra of (a) @TiO<sub>2</sub> and (b) @C-TiO<sub>2</sub> powders (**Fig. S10**).
- 12) GC chart of reaction mixture obtained from LA reaction using (*op*)Ru@C-TiO<sub>2</sub> (2.0 wt%) catalyst at 200 °C, H<sub>2</sub> 30 bar after 180 min (**Fig. S11**).
- 13) Calibration curves of reactant (LA) and products (GVL, 2-BuOH, and 2-PeOH) to obtain their response factors (**Fig. S12**).
- 14) The <sup>1</sup>H-NMR spectra of reaction mixture obtained from LA reaction to 2-BuOH (**Fig. S13**).
- 15) The catalytic conversion of LA to GVL over Ru-based catalysts (**Table S2**).
- 16) Effect of catalyst dosage on the conversion of LA to 2-BuOH (**Table S3**).

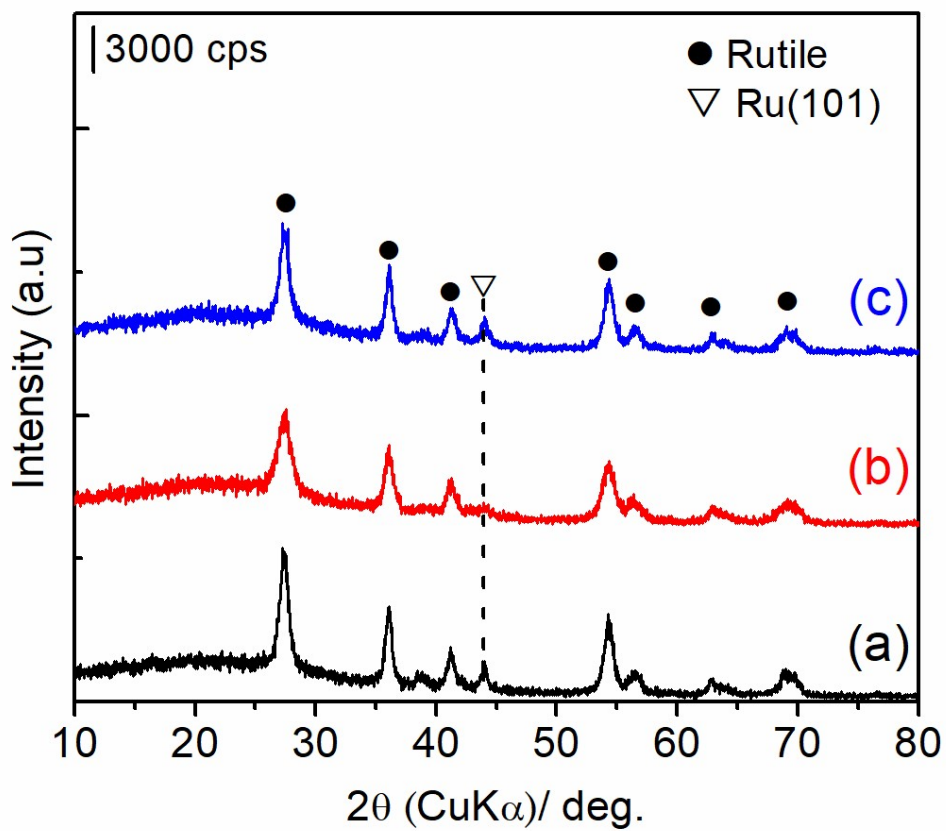

**Fig. S1** XRD pattern of (*op*)Ru@C-TiO<sub>2</sub> catalysts with different amount of carbon doping ((a) 1.0 wt%, (b) 2.0 wt%, (c) 3.0 wt%) after reduction with H<sub>2</sub> at 400 °C for 2 h.

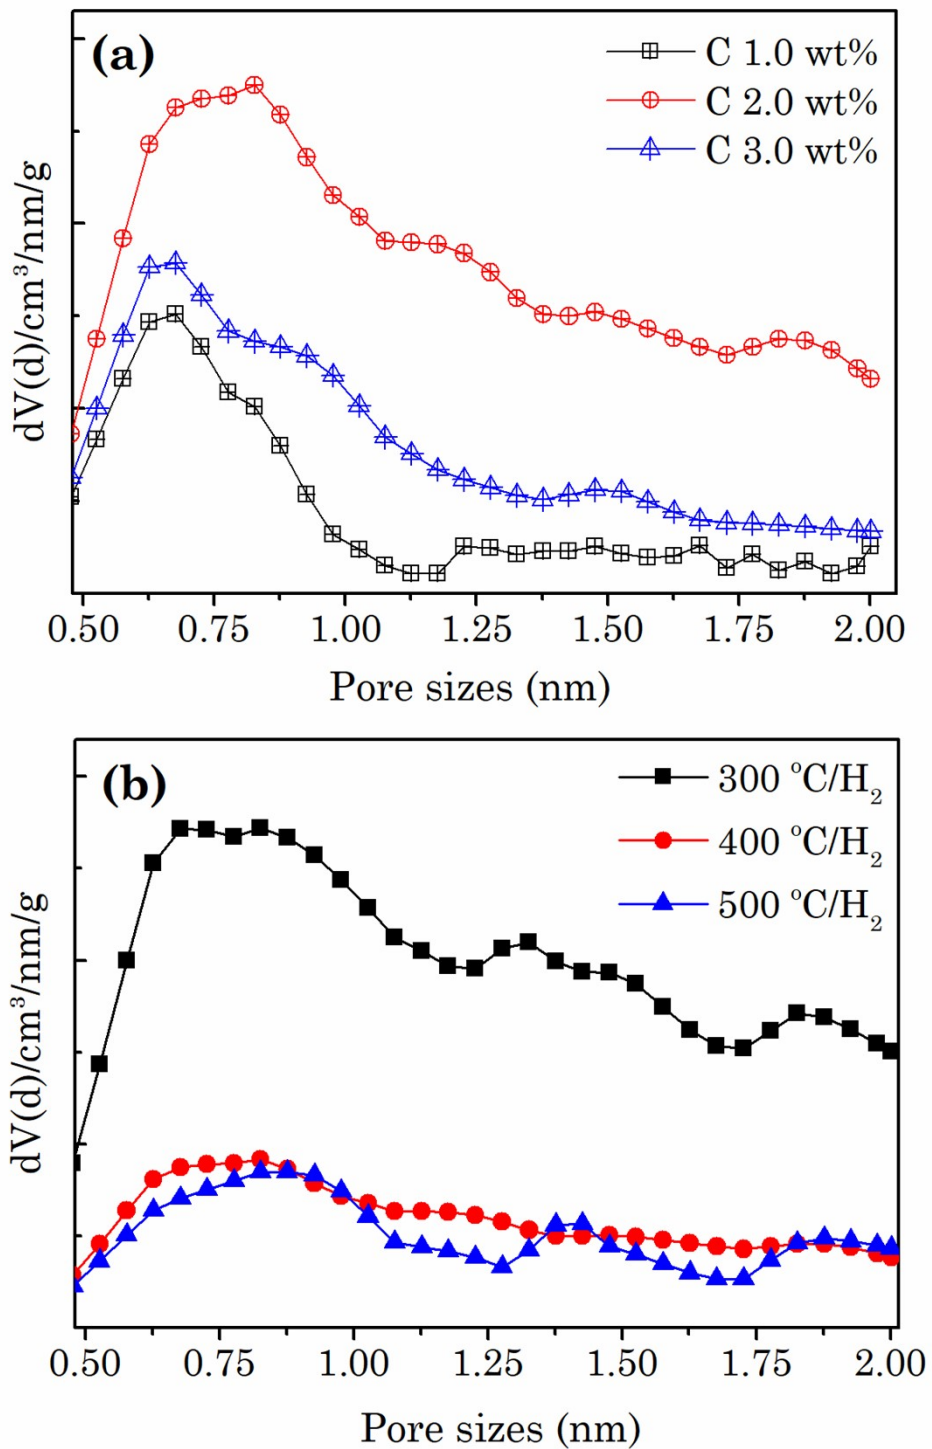

**Fig. S2** Pore sizes distribution calculated by using Hovartz-Kawazoe (HK) method for  $(op)Ru@C-TiO_2$  sample with (a) different amount of C-doping and (b) different reduction temperature with  $H_2$  for 2 h.

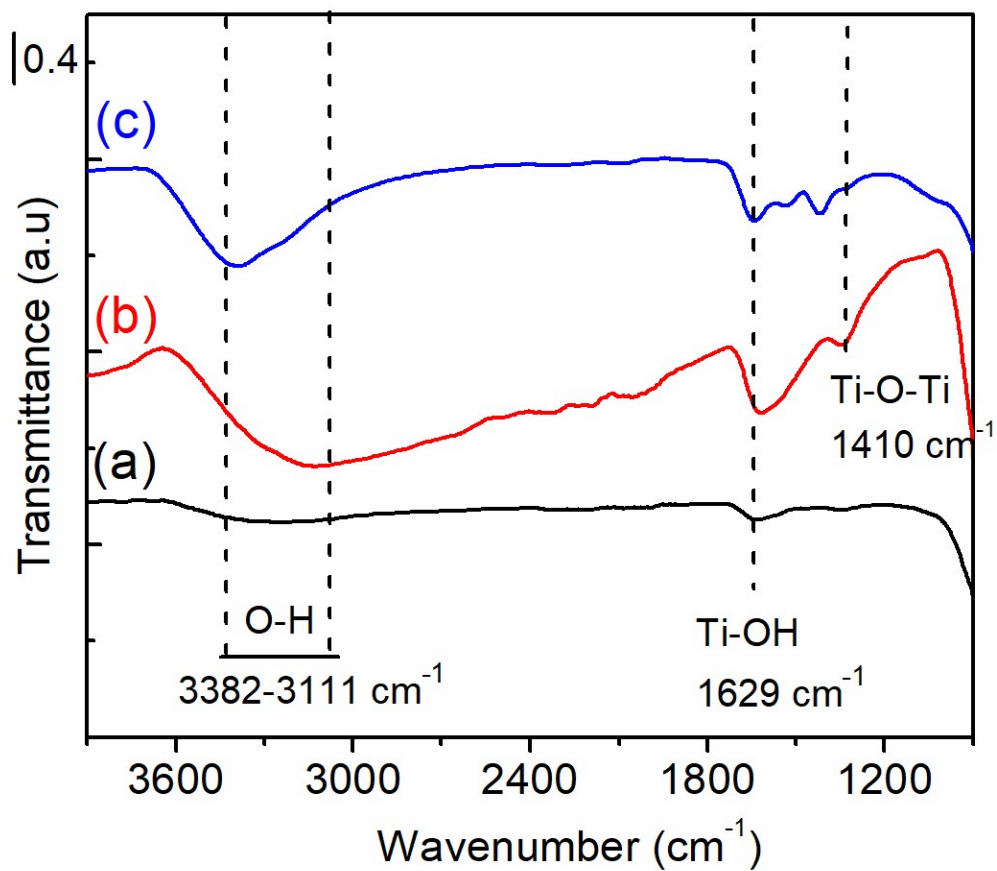

**Fig. S3** ATR-IR spectra of (a) @TiO<sub>2</sub>, (b) @C-TiO<sub>2</sub> (2.0 wt%), and (c) (*op*)Ru@C-TiO<sub>2</sub> (2.0 wt%) catalysts after drying at room temperature.

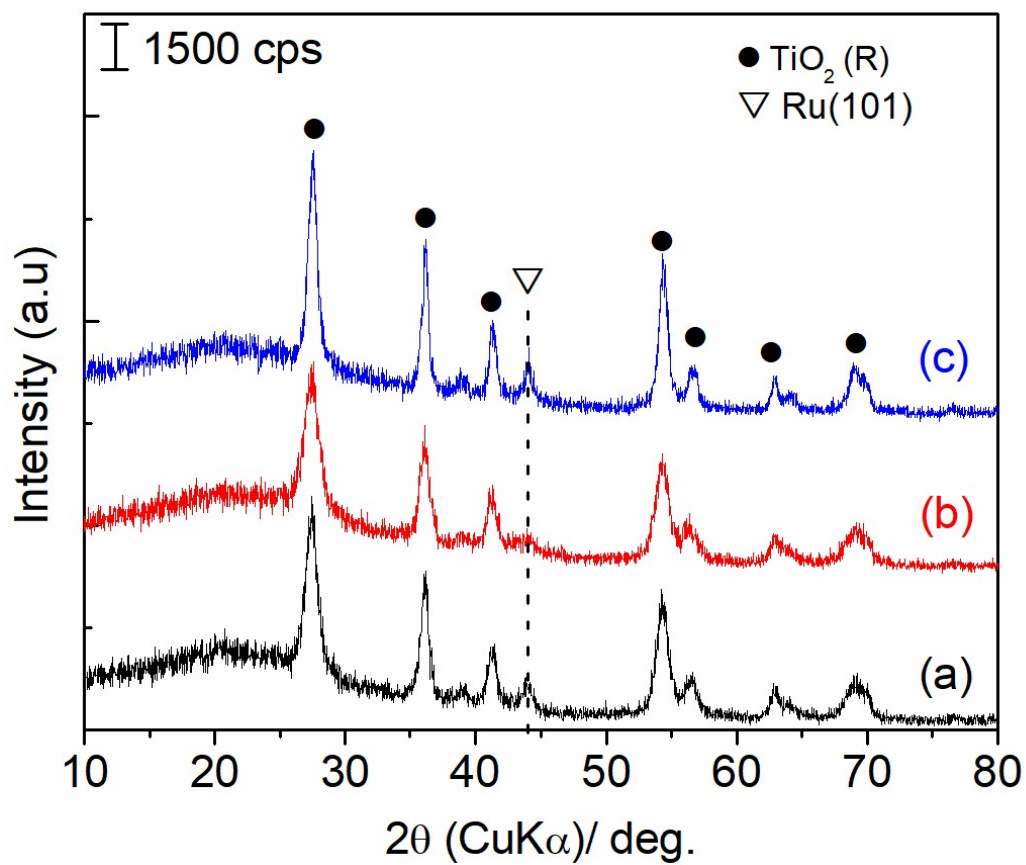

**Fig. S4** XRD patterns of (op)Ru@C-TiO<sub>2</sub> (C = 2.0 wt%) after reduction with H<sub>2</sub> at different temperatures of (a) 300 °C, (b) 400 °C, and (c) 500 °C for 2 h.

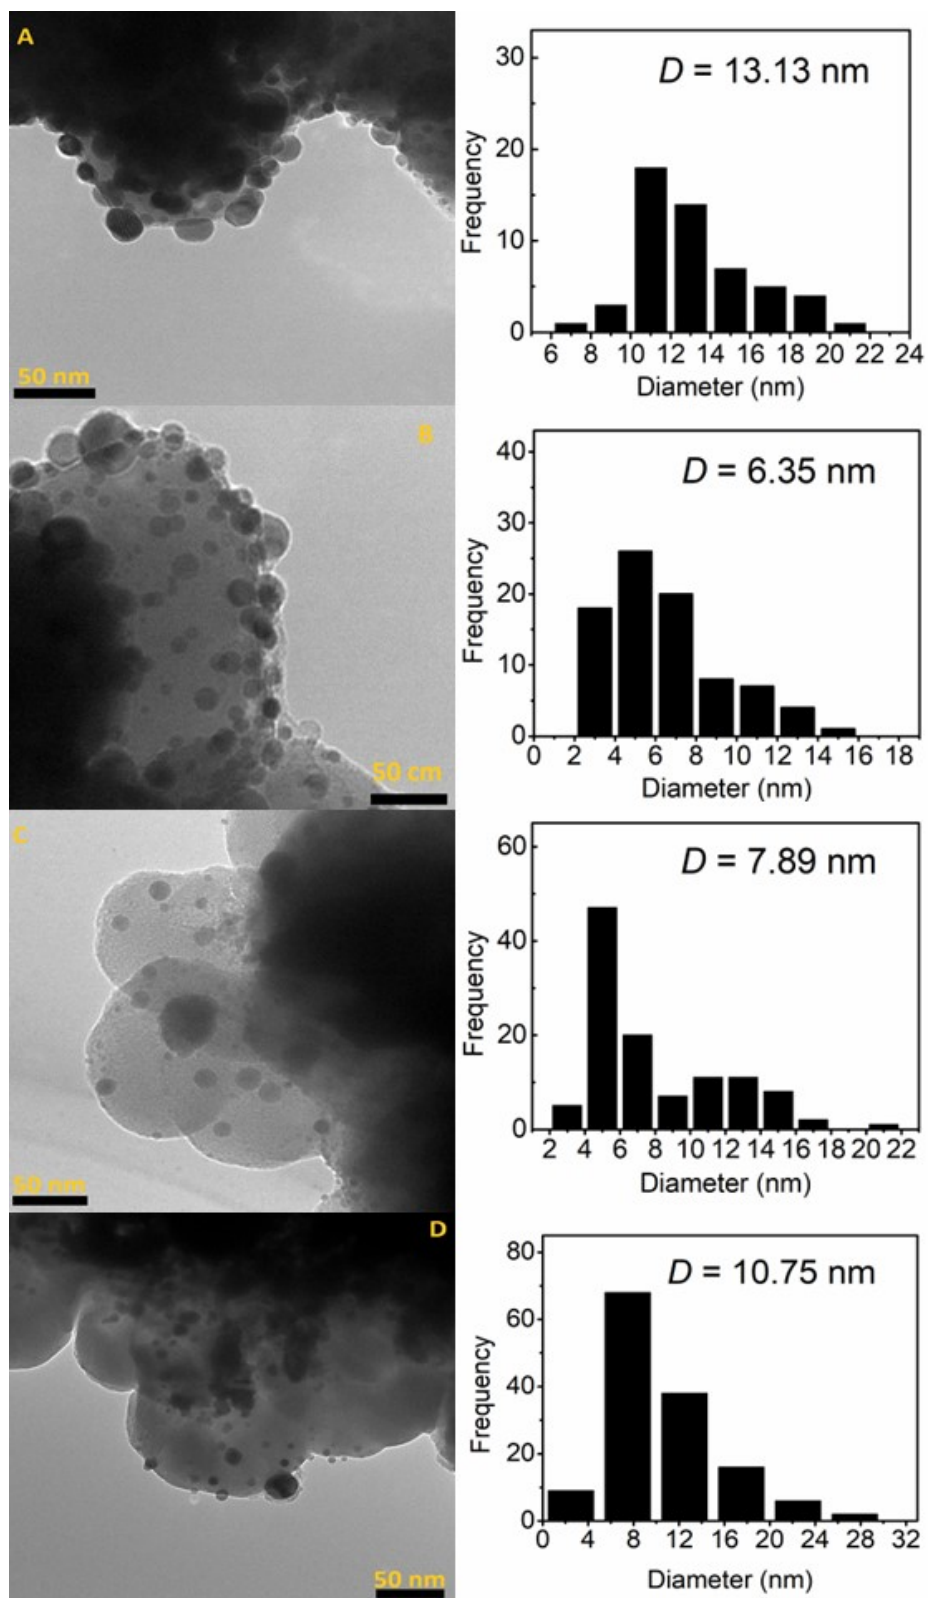

**Fig. S5** TEM analysis of  $(op)Ru@C-TiO_2$  (2.0 wt%) catalysts after reduction with  $H_2$  at (a) 300 °C, (b) 400 °C and (c) 500 °C for 2 h, and (d) recovered  $(op)Ru@C-TiO_2$  400 °C/ $H_2$  catalyst.

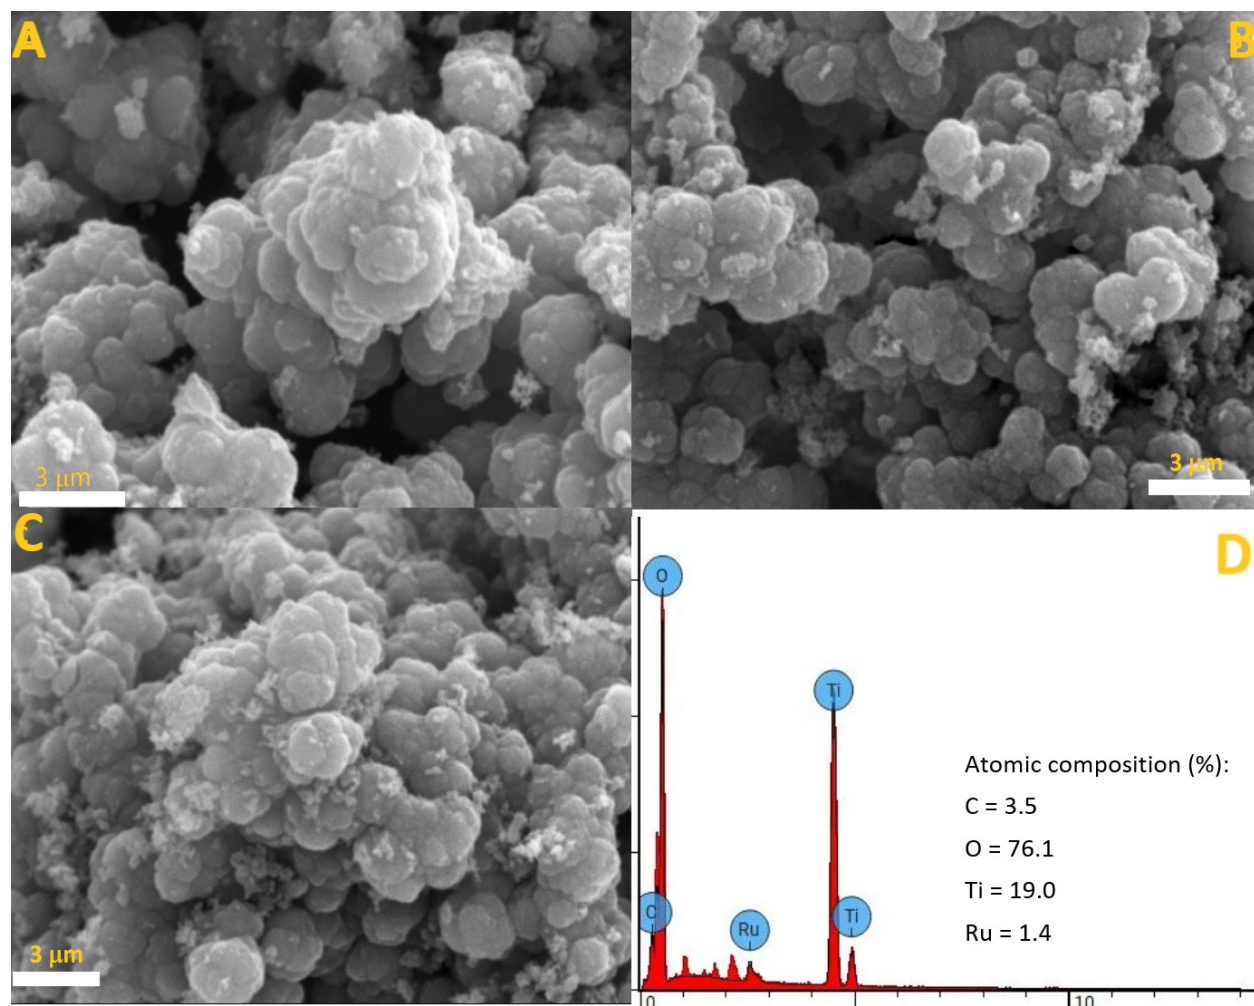

**Fig. S6** SEM analysis of  $(op)Ru@C-TiO_2$  with different amount of C-doping (a) 1.0 wt%; (b) 2.0 wt%) and (c) 3.0 wt%, and (d) typical EDS spectra of  $(op)Ru@C-TiO_2$  (1.0 wt%) catalysts after reduction with  $H_2$  at 400 °C for 2 h.



**Table S1** Overall carbon content and bulk composition (%) of synthesised Ru@C-TiO<sub>2</sub> catalyst

| Entry | Sample                                       | Ru <sup>a</sup><br>(wt%) | Ti <sup>a</sup><br>(wt%) | C <sup>b</sup><br>(wt%) |
|-------|----------------------------------------------|--------------------------|--------------------------|-------------------------|
| 1     | ( <i>op</i> )Ru@C-TiO <sub>2</sub> (1.0 wt%) | 4.91                     | 53.12                    | 0.29                    |
| 2     | ( <i>op</i> )Ru@C-TiO <sub>2</sub> (2.0 wt%) | 4.92                     | 50.23                    | 1.05                    |
| 3     | ( <i>op</i> )Ru@C-TiO <sub>2</sub> (3.0 wt%) | 4.89                     | 51.72                    | 1.72                    |
| 4     | ( <i>cop</i> )Ru@C-TiO <sub>2</sub>          | 4.54                     | 57.21                    | 1.17                    |

<sup>a</sup>The bulk composition (%) was determined by using inductively coupled plasma atomic emission spectroscopy (ICP-AES). <sup>b</sup>Overall carbon contents were obtained by performing an elemental analysis.

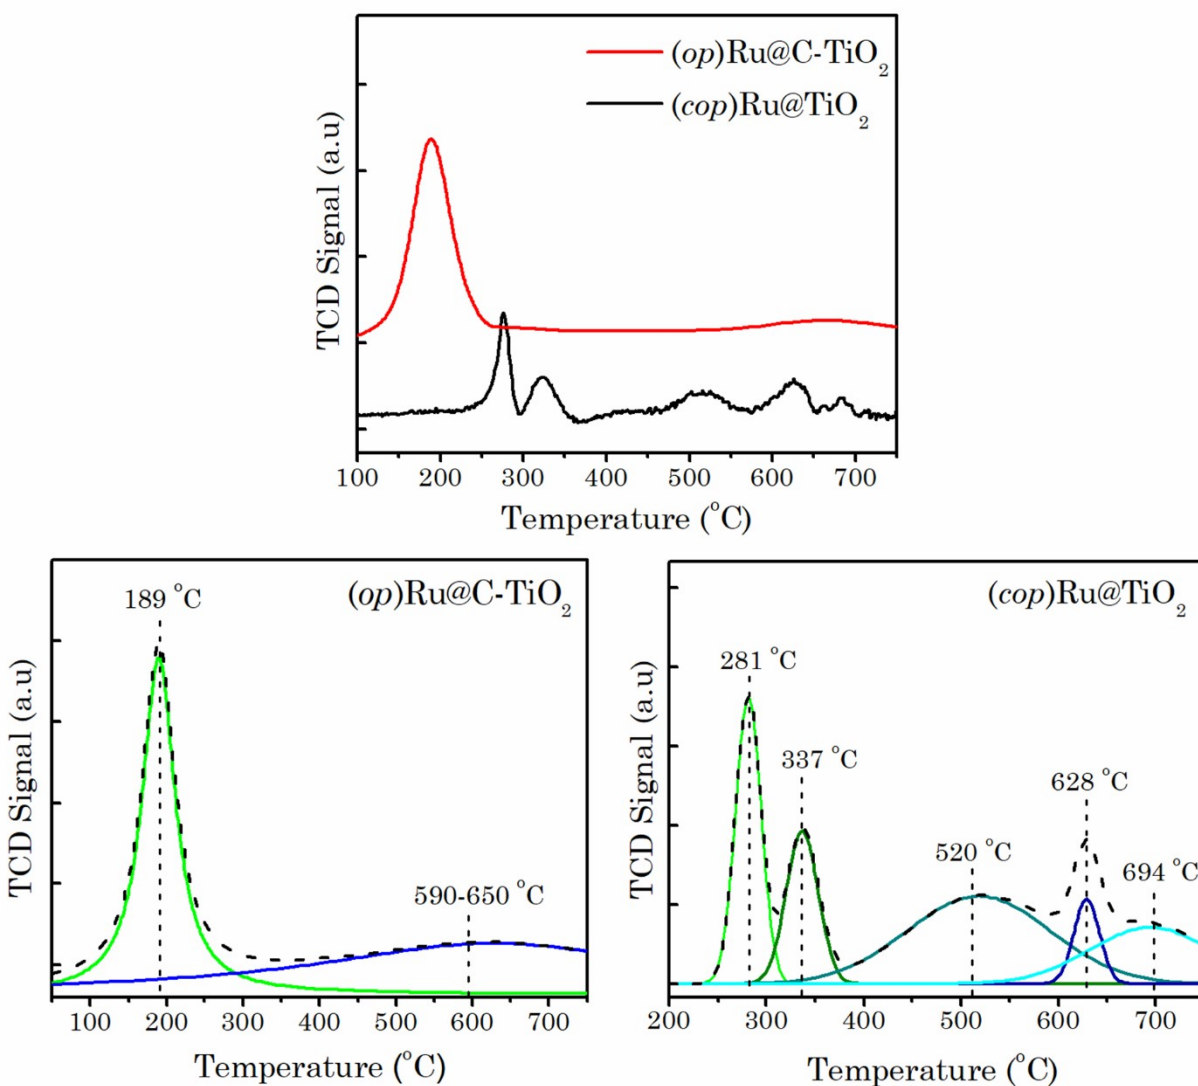

**Fig. S7** The H<sub>2</sub>-TPR profiles of Ru@TiO<sub>2</sub> and (*op*)Ru@C-TiO<sub>2</sub> (2.0 wt%) catalysts and their deconvoluted spectra.

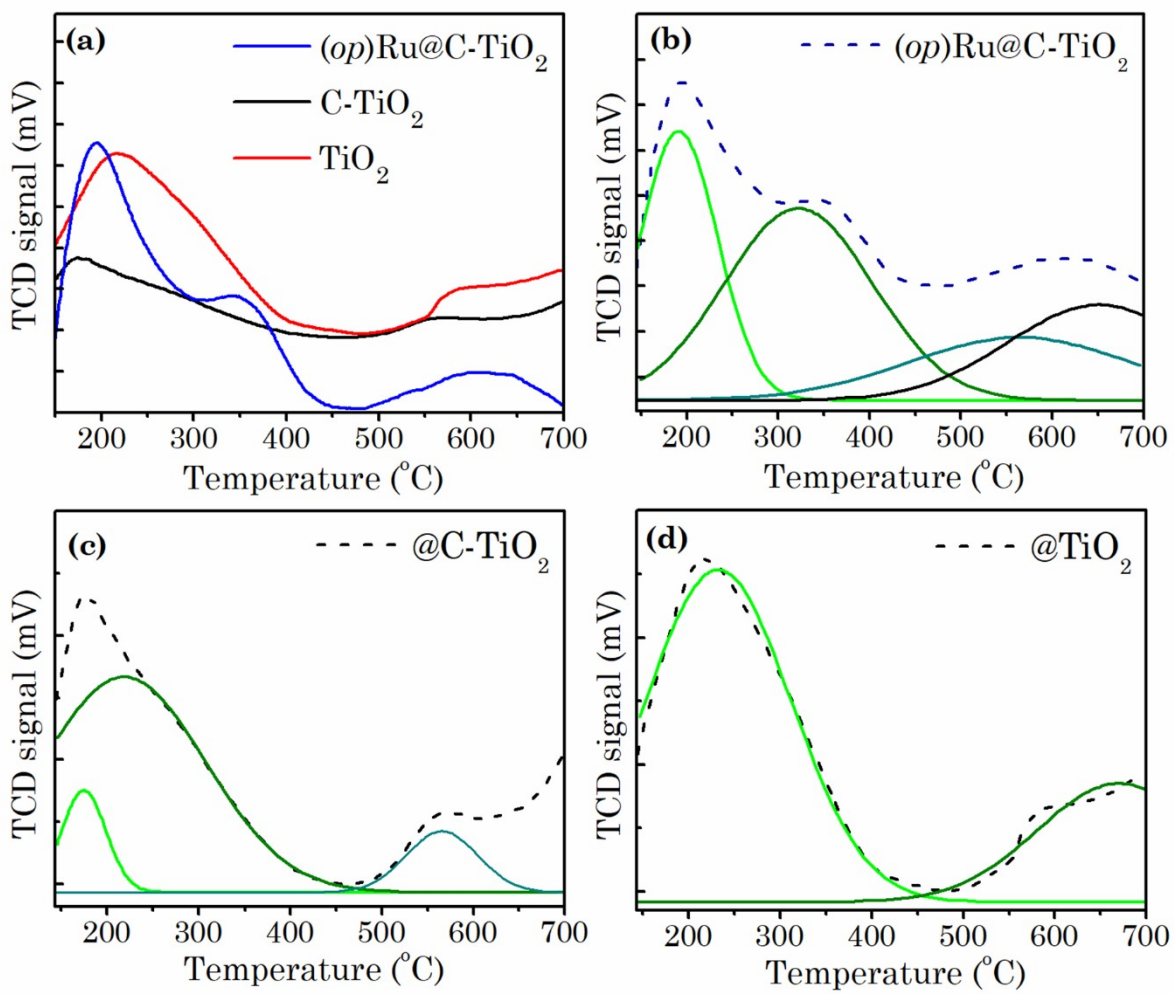

**Fig. S8** NH<sub>3</sub>-TPD spectra of @TiO<sub>2</sub>, @C-TiO<sub>2</sub> supports and (*op*)Ru@C-TiO<sub>2</sub> (2.0 wt%) catalysts and their deconvoluted spectra.

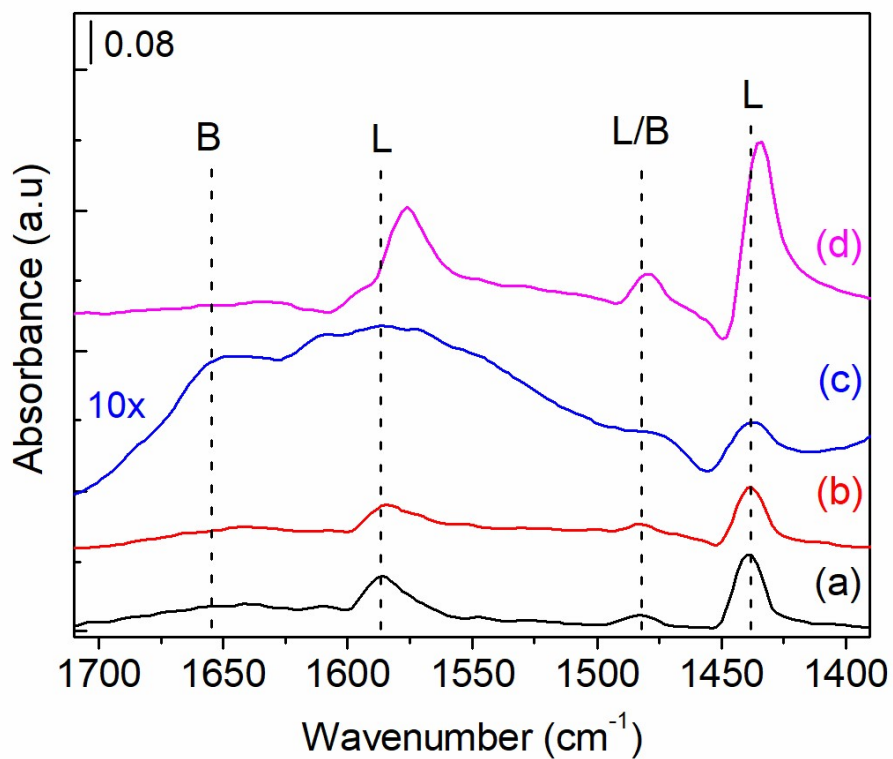

**Fig. S9** ATR-IR spectra of adsorbed pyridine on the surface of (a) (*cop*)Ru@TiO<sub>2</sub> (*op*)Ru@C-TiO<sub>2</sub> (1.0 wt%), (c) (*op*)Ru@C-TiO<sub>2</sub> (2.0 wt%), and (d) (*op*)Ru@C-TiO<sub>2</sub> (3.0 wt%) catalysts.

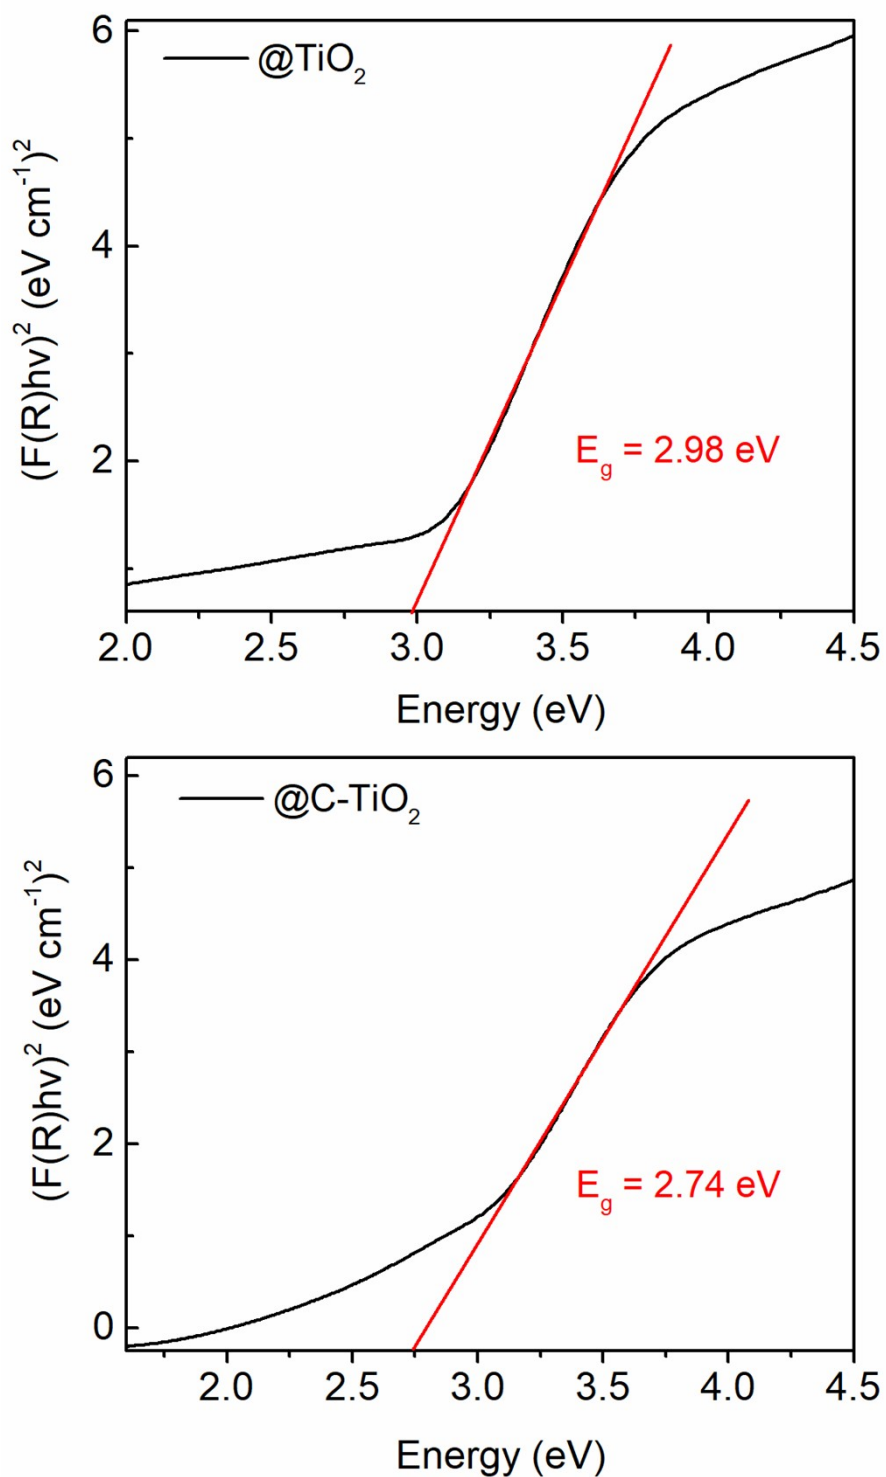

**Fig S10.** The Kubelka-Munk profiles of (a) @TiO<sub>2</sub> and (b) @C-TiO<sub>2</sub> powders derived from UV-Vis DRS spectra.



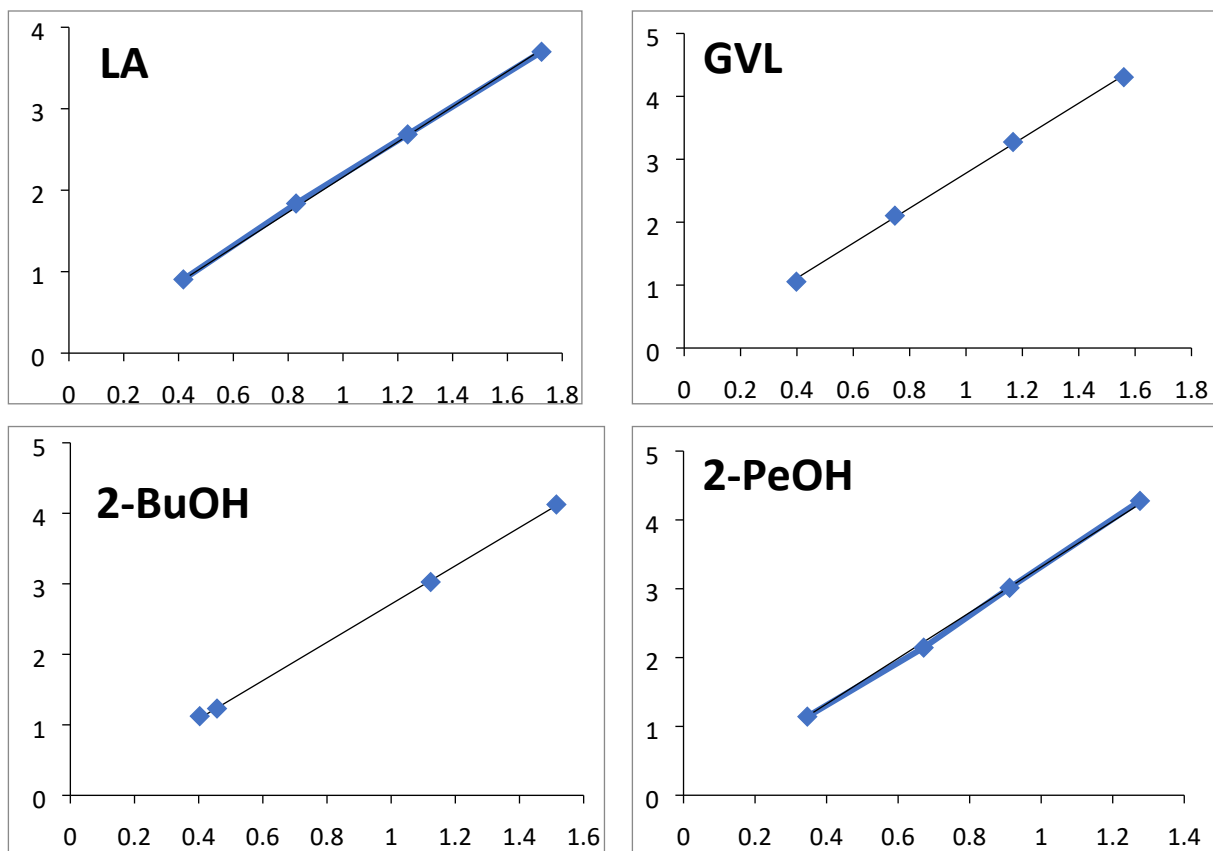

**Fig. S12** Calibration curves of reactant (LA) and products (GVL, 2-BuOH, and 2-PeOH) to obtain their response factors.

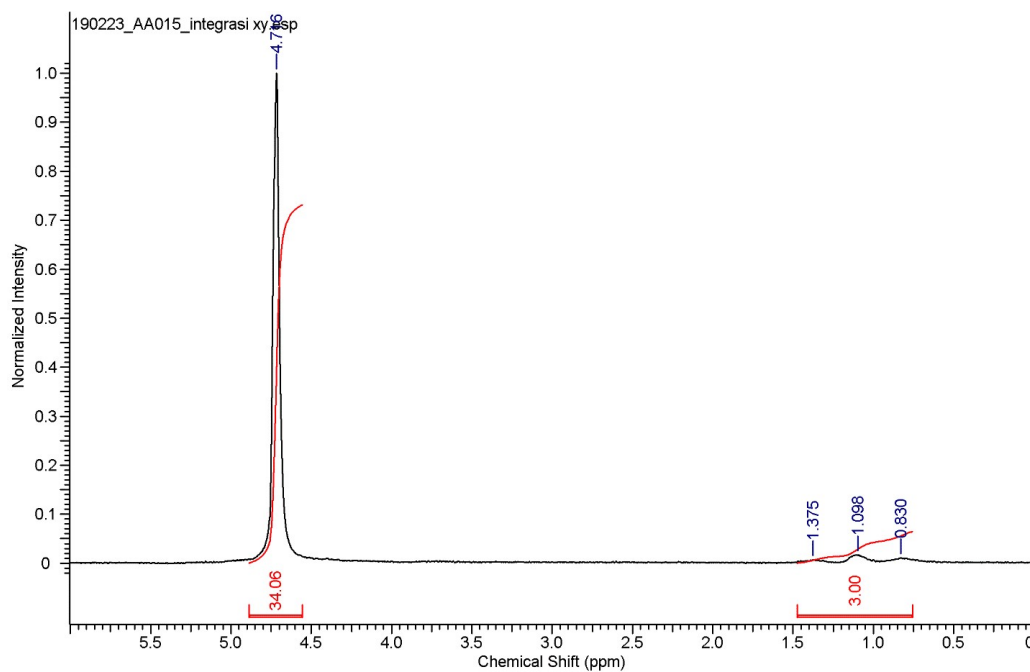

**Fig. S13** <sup>1</sup>H-NMR spectra of reaction mixture obtained from LA reaction to 2-BuOH in D<sub>2</sub>O solvent using (*op*)Ru@C-TiO<sub>2</sub> (2.0 wt%) catalyst at 200 °C, H<sub>2</sub> 30 bar after 3 h.

**Table S2** Results of LA catalytic conversion over various supported Ru-based catalysts

| Entry | Catalyst                               | Conv. <sup>a</sup> (%) | Yield <sup>a</sup> (%) |        |         |     |                     |
|-------|----------------------------------------|------------------------|------------------------|--------|---------|-----|---------------------|
|       |                                        |                        | 2-BuOH                 | 2-PeOH | 1,4-PeD | GVL | Others <sup>b</sup> |
| 1     | ( <i>op</i> )Ni@C-TiO <sub>2</sub>     | 100                    | 2                      | 0      | 6       | 85  | 8                   |
| 2     | ( <i>op</i> )Cu@C-TiO <sub>2</sub>     | 41                     | 0                      | 0      | 4       | 31  | 6                   |
| 3     | ( <i>op</i> )Co@C-TiO <sub>2</sub>     | 34                     | 4                      | 0      | 26      | 4   | 0                   |
| 4     | Ru/ZrO <sub>2</sub>                    | 97                     | 11                     | 0      | 10      | 74  | 2                   |
| 5     | Ru/γ-Al <sub>2</sub> O <sub>3</sub>    | 100                    | 25                     | 0      | 5       | 36  | 27                  |
| 6     | Ru/Al <sub>2</sub> O <sub>3</sub> -500 | 100                    | 32                     | 0      | 1       | 58  | 15                  |
| 7     | Ru-Sn/γ-Al <sub>2</sub> O <sub>3</sub> | 100                    | 0                      | 0      | 0       | 98  | 2                   |
| 8     | Ru-Sn/C                                | 100                    | 1                      | 0      | 31      | 63  | 5                   |
| 9     | Ru-Ni/C                                | 100                    | 1                      | 0      | 0       | 88  | 11                  |
| 10    | Ru-MoOx/C                              | 100                    | 2                      | 0      | 0       | 83  | 15                  |
| 11    | Ru-MoOx/TiO <sub>2</sub>               | 86                     | 2                      | 0      | 0       | 78  | 6                   |
| 12    | Ru-MoOx/SiO <sub>2</sub>               | 100                    | 1                      | 0      | 0       | 95  | 4                   |
| 13    | @C-TiO <sub>2</sub>                    | 30                     | 0                      | 0      | 0       | 0   | 30                  |
| 14    | @TiO <sub>2</sub>                      | 23                     | 0                      | 0      | 0       | 0   | 23                  |

Reaction conditions: catalyst (50 mg), LA (2 mmol), H<sub>2</sub>O (3 mL), 200 °C, 30 bar H<sub>2</sub>, 3 h. <sup>a</sup>Conversion of LA and Yield of products were determined by GC using an internal standard technique. <sup>b</sup>Others (include 2-methyltetrahydrofuran (2-MeTHF) and 1-Pentanol (1-PeOH)) were determined by GC using total area to the LA conversion. 2-BuOH = 2-Butanol. 2-PeOH = 2-Pentanol. 1,4-PeD = 1,4-Pentenediol. GVL = γ-Valerolactone.

**Table S3.** Effect of catalyst dosage on the conversion of LA to 2-BuOH.

| Entry | Catalyst dosage (g) | LA/Ru (molar ratio) <sup>a</sup> | Conv. <sup>b</sup> (%) | Yield <sup>b</sup> (%) |        |         |     |                     |
|-------|---------------------|----------------------------------|------------------------|------------------------|--------|---------|-----|---------------------|
|       |                     |                                  |                        | 2-BuOH                 | 2-PeOH | 1,4-PeD | GVL | Others <sup>c</sup> |
| 1     | 0.0522              | 75                               | 100                    | 87                     | 11     | 0       | 2   | 0                   |
| 2     | 0.0251              | 159                              | 100                    | 37                     | 11     | 0       | 40  | 12                  |
| 3     | 0.0126              | 324                              | 100                    | 2                      | 0      | 0       | 93  | 5                   |

Reaction conditions: catalyst = (*op*)Ru@C-TiO<sub>2</sub> (2.0 wt%) 400 °C/H<sub>2</sub>, LA (2 mmol), solvent (3 mL), 200 °C, 30 bar H<sub>2</sub>, 3 h. <sup>a</sup>The molar ratio of reactant to catalyst was estimated based on the rough amount of Ru precursor in the (*op*)Ru@C-TiO<sub>2</sub>. <sup>b</sup>Conversion of LA and yield of products were determined by GC using an internal standard technique. <sup>c</sup>Others (include 2-methyltetrahydrofuran (2-MeTHF) and 1-Pentanol (1-PeOH)) were determined by GC using total area to the LA conversion. 2-BuOH = 2-Butanol. 2-PeOH = 2-Pentanol. 1,4-PeD = 1,4-Pentenediol. GVL = γ-Valerolactone.
